# Supplementary material for: Genetic and metabolic signatures of Salmonella enterica subsp. enterica associated with animal sources at the pangenomic scale
Source: PubMed Central journal article supplement (PMC6836353; doi:10.1186/s12864-019-6188-x), 2019-11-06

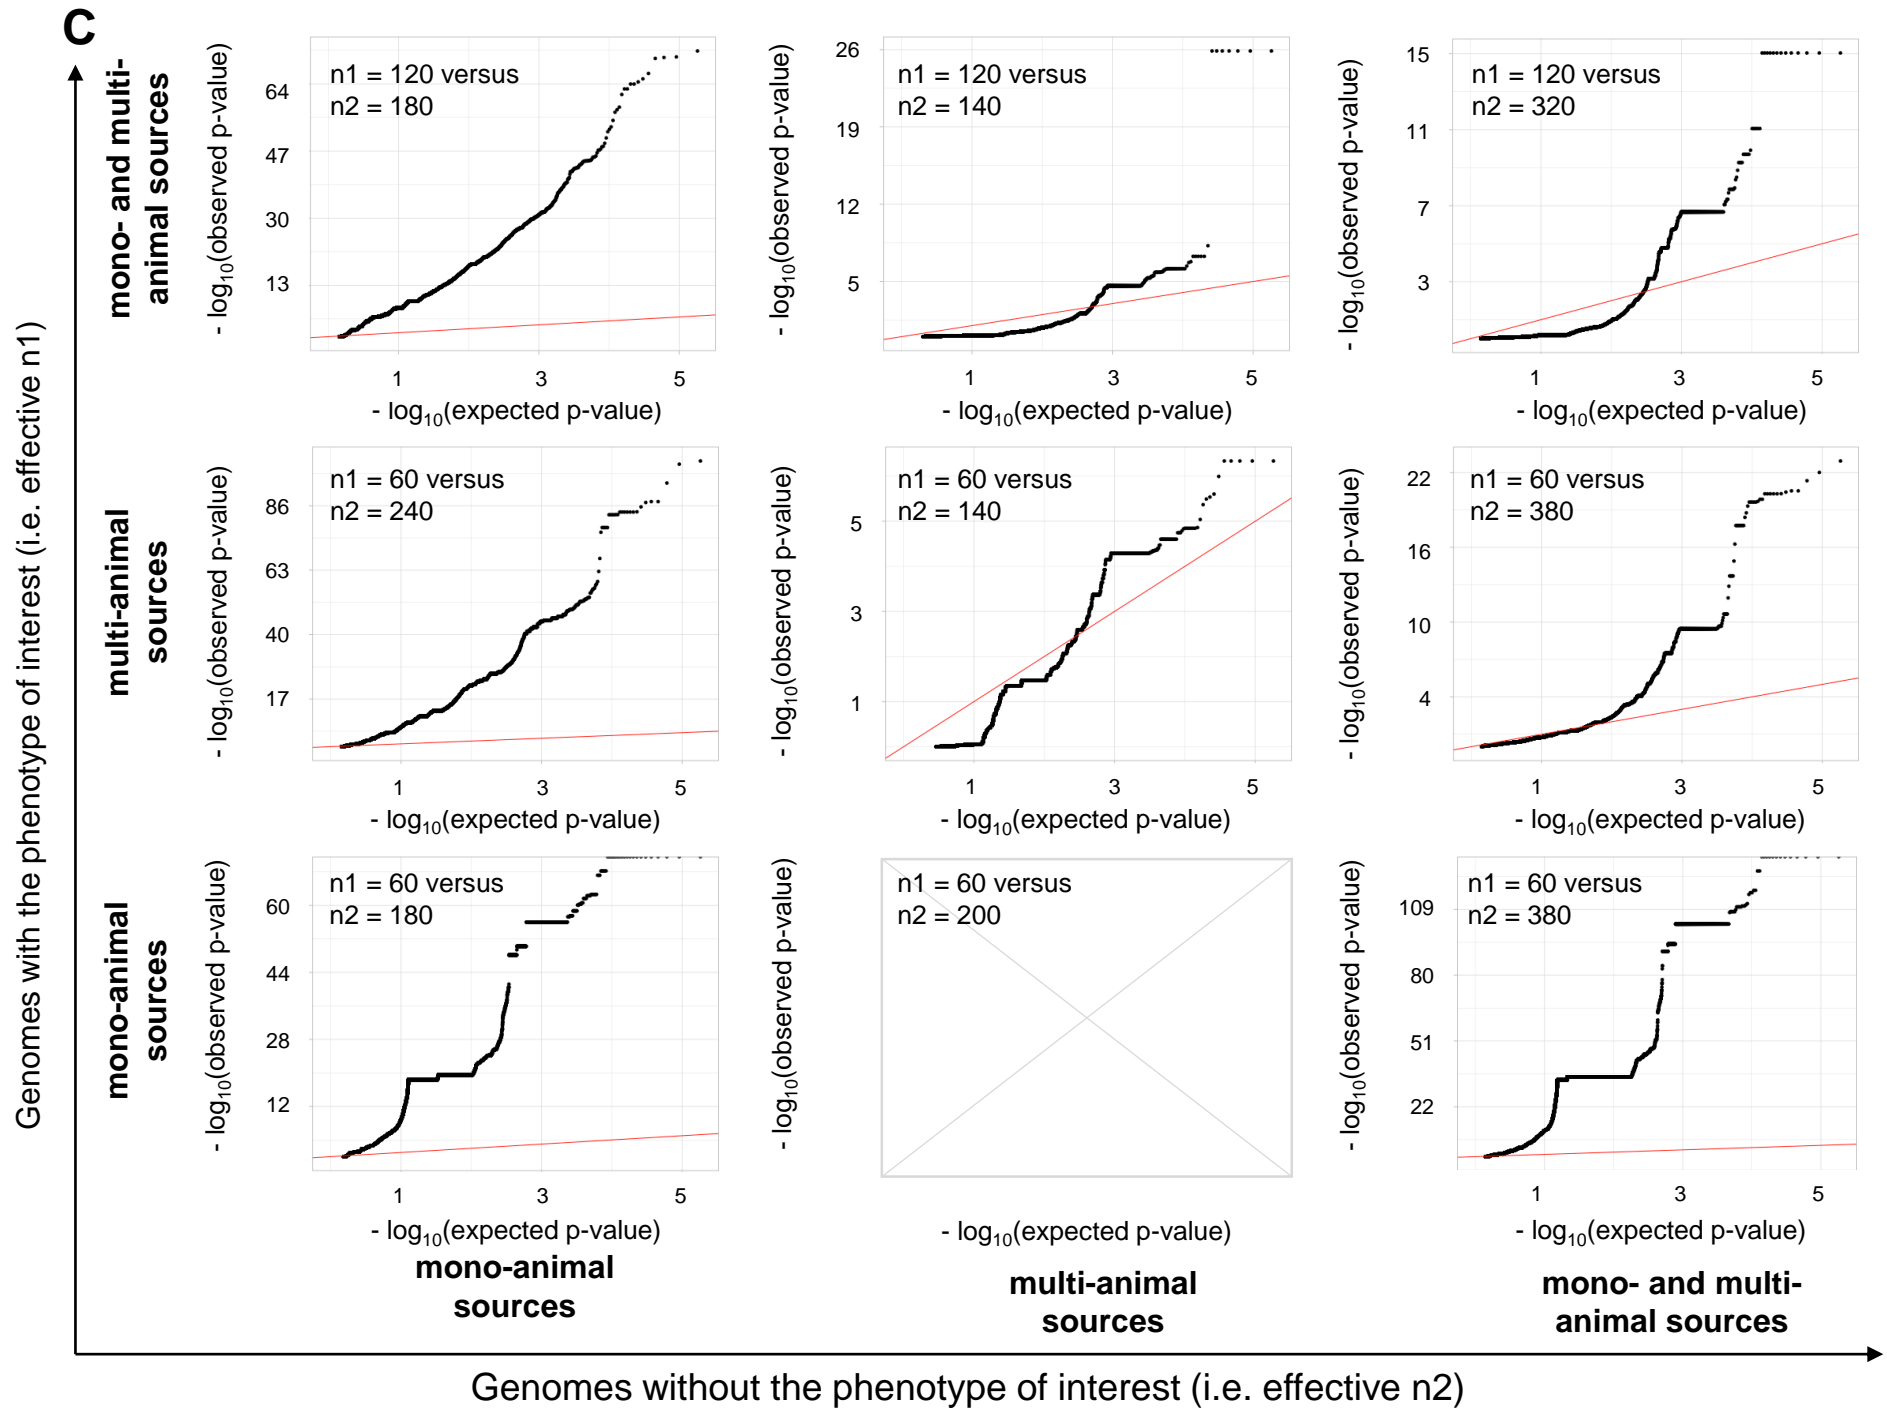

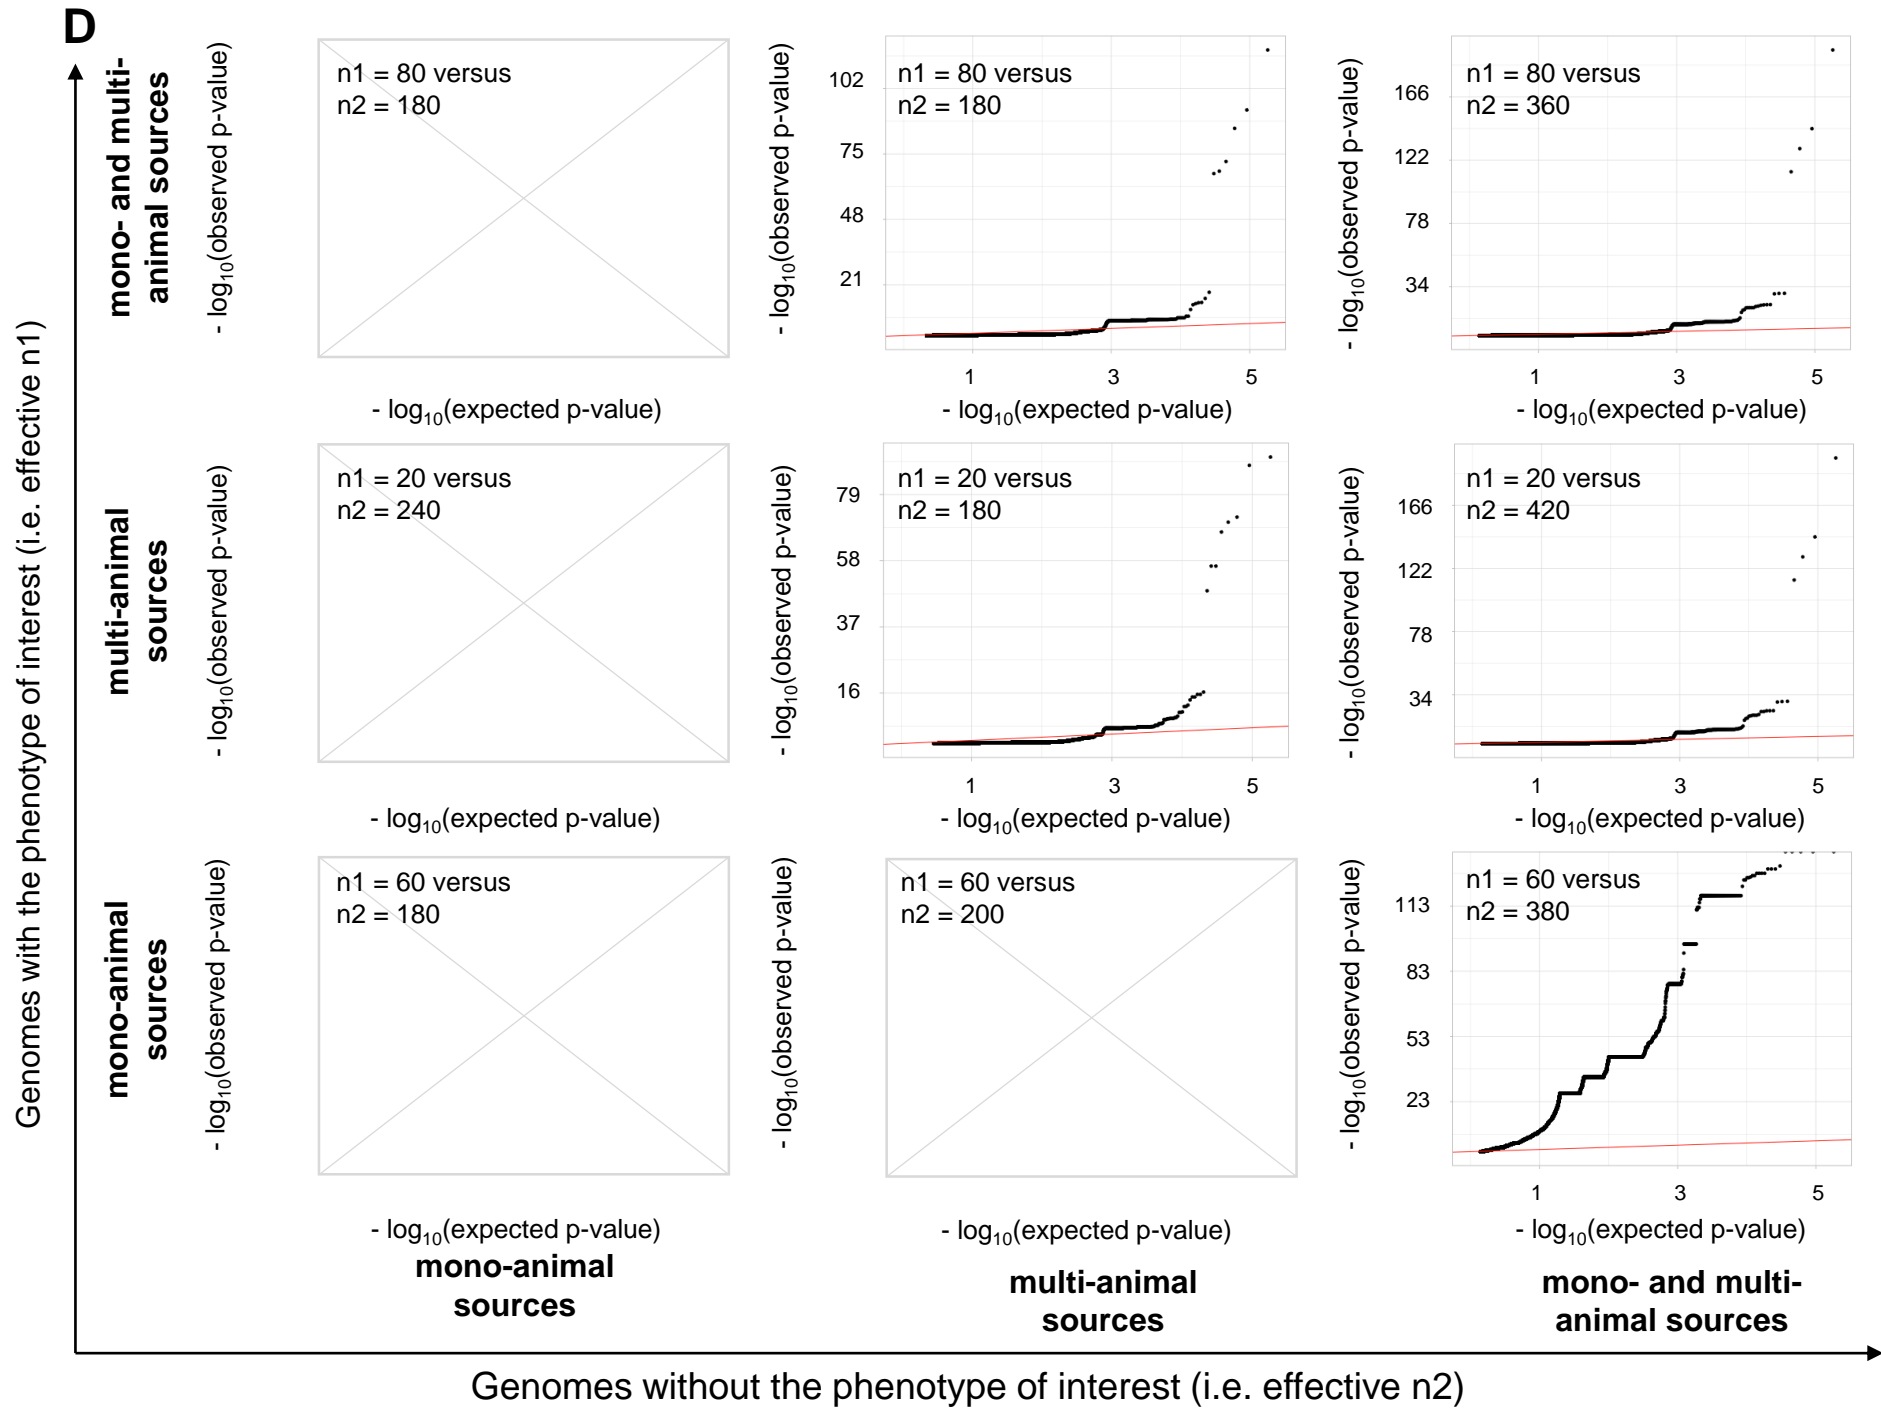

Supplement: 12864_2019_6188_MOESM6_ESM.pdf [file 12864_2019_6188_MOESM6_ESM.pdf]
